# Supplementary material for: Ultrafast-charging and durable organic cathodes enabled by two-dimensional supramolecular engineering
Source: Research Square preprint supplement (doi:10.21203/rs.3.rs-7763674/v1), 2025-10-03
Supplement: Supplementary file 1 [file 32e8eec527c7cdcf067f2854.pdf]

Supplementary Information for

**Ultrafast-charging and durable organic cathodes enabled by  
two-dimensional supramolecular engineering**

Li Liu, Xianming Deng, Qingxuan Chen, Yuantao Ma, Xinming Zhang, Hongyin Hu,  
Ling Qiu, Lele Peng\* and Zhen Chen\*

\* Correspondence: penglele@sz.tsinghua.edu.cn (L.P.);  
zhen.chen@sz.tsinghua.edu.cn (Z.C.)

**This PDF file includes:**

1. Supplementary Notes 1–3
2. Supplementary Figures 1–30
3. Supplementary Tables 1–5
4. Supplementary References 1–30

## 1. Supplementary Notes

### Supplementary Note 1 | Kinetic analysis of Li<sup>+</sup> storage

The electrochemical reaction kinetics was investigated through cyclic voltammetry measurements. Theoretically, the current ( $i$ ) response to the applied scan rate ( $v$ ) follows the equation (S1) as below,

$$i = a \cdot v^b \quad (\text{S1})$$

, where  $b$  refers to the slope of the linear fit of the log-log plot. According to the power law described above, a redox reaction limited by semi-infinite linear diffusion gives a  $b$  value of 0.5, while for a surface-controlled capacitive process, the  $b$  value is close to 1.0. Furthermore, the capacitive ( $k_1 \cdot v$ ) and diffusive ( $k_2 \cdot v^{1/2}$ ) contributions were further quantified according to the equation (S2),

$$i = k_1 \cdot v + k_2 \cdot v^{1/2} \quad (\text{S2})$$

, where  $k_1$  and  $k_2$  constants can be obtained by plotting  $i \cdot v^{-1/2}$  against  $v^{1/2}$ .

### Supplementary Note 2 | Determination of Li<sup>+</sup> diffusion coefficients

In the Nyquist plots, the linear part of the Warburg impedance is directly related to Li<sup>+</sup> diffusion in the cathode materials. The  $D_{\text{Li}^+}$  values were also calculated based on the equation (S3):

$$D_{\text{Li}^+} = \frac{1}{2} \left( \frac{RT}{ACn^2F^2\sigma_w} \right)^2 \quad (\text{S3})$$

, where  $R$  is the gas constant,  $T$  is the room temperature (298 K),  $A$  represents the surface area of electrode,  $C$  is the concentration of Li<sup>+</sup>,  $n$  is the number of transferred electrons,  $F$  is the Faraday constant, and  $\sigma_w$  denotes the slope obtained by the linear fitting of the real part ( $Z'$ ) of impedance and low frequency ( $\omega$ ) according to the equation (S4),

$$Z' = R_s + R_{\text{sei}} + R_{\text{ct}} + \sigma_w \cdot \omega^{-1/2} \quad (\text{S4})$$

, where  $R_s$ ,  $R_{\text{sei}}$ , and  $R_{\text{ct}}$  is the resistance of the electrolyte, the Li<sup>+</sup> migration through SEI and the desolvation process, respectively.

### Supplementary Note 3 | Determination of activation energies

To determine the activation energies during Li<sup>+</sup> desolvation and diffusion, respectively, the important parameters for Li<sup>+</sup> transport kinetics represented by the charge transfer resistance ( $R_{\text{ct}}$ ) and  $D_{\text{Li}^+}$  were measured by temperature-dependent EIS from 30 to -30 °C. According to the classic Arrhenius law, the  $R_{\text{ct}}$  and  $D_{\text{Li}^+}$  values at varying temperatures were fitted into the equations (S5) and (S6), respectively,

$$\ln R_{\text{ct}}^{-1} = \ln A - \frac{E_{\text{a,ct}}}{RT} \quad (\text{S5})$$

$$\ln D_{\text{Li}^+} = \ln A - \frac{E_{\text{a,D}}}{RT} \quad (\text{S6})$$

, where  $A$  and  $B$  are pre-exponential factors,  $R$  is the gas constant,  $T$  is the absolute temperature,  $E_{\text{a,ct}}$  and  $E_{\text{a,D}}$  are the activation energies for  $\text{Li}^+$  desolvation and diffusion, respectively.

## 2. Supplementary Figures

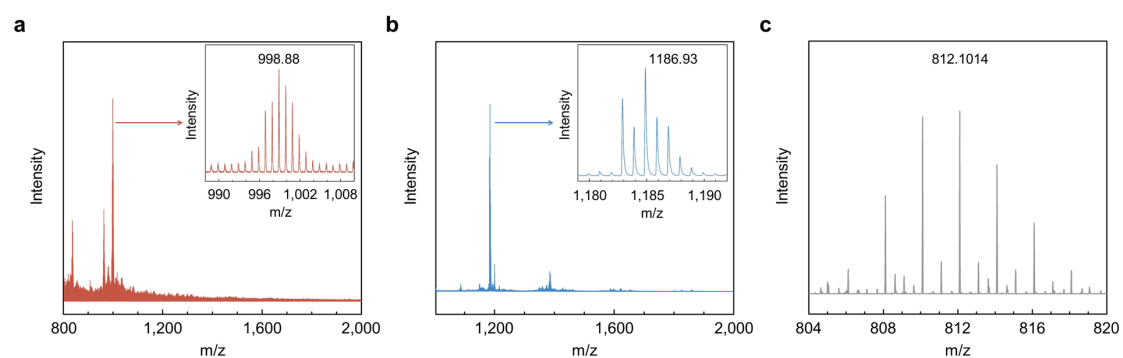

**Supplementary Fig. 1 | Structure characterization of heterocyclic TTQs.**

(a,b) MALDI-TOF mass spectra (positive mode): (a) STTQ-1 and (b) STTQ-2. (c) High-resolution ESI mass spectrum (negative mode) of OTTQ.



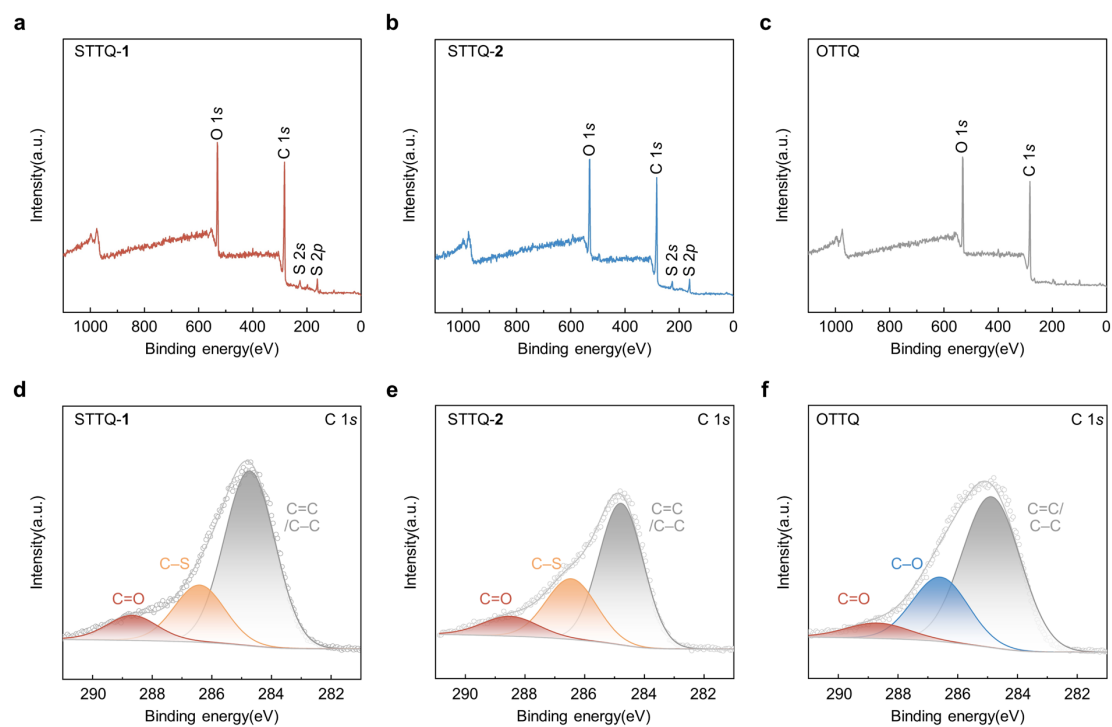

**Supplementary Fig. 2 | Chemical characterization of heterocyclic TTQs.**

XPS spectra of bulk samples: (a–c) Survey scans and (d–f) C 1s core-level spectra for STTQ-1 (a,d), STTQ-2 (b,e), and OTTQ (c,f).

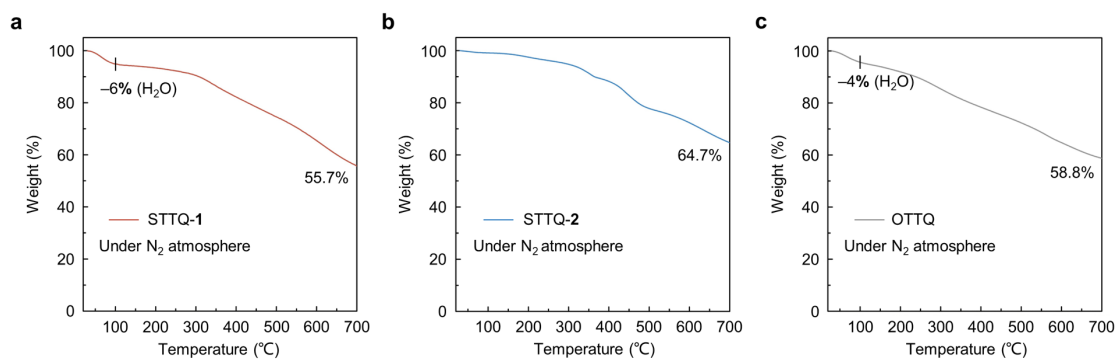

**Supplementary Fig. 3 | Evaluation on the thermal stability of heterocyclic TTQs.**  
TGA profiles of the powdery samples under nitrogen atmosphere: (a) STTQ-1, (b) STTQ-2 and (c) OTTQ.

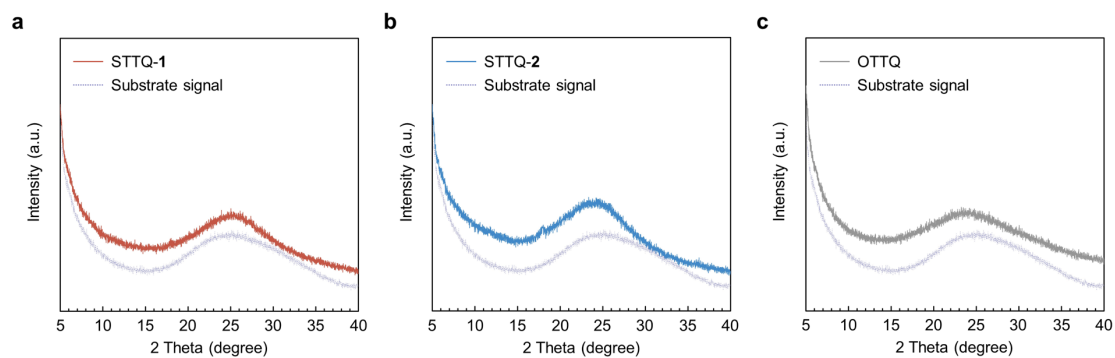

**Supplementary Fig. 4 | Evaluation on the crystallinity of heterocyclic TTQs.**  
XRD patterns of the powdery samples at 25 °C: (a) STTQ-1, (b) STTQ-2 and (c) OTTQ.  
None of the distinct peaks can be observed in the XRD patterns.

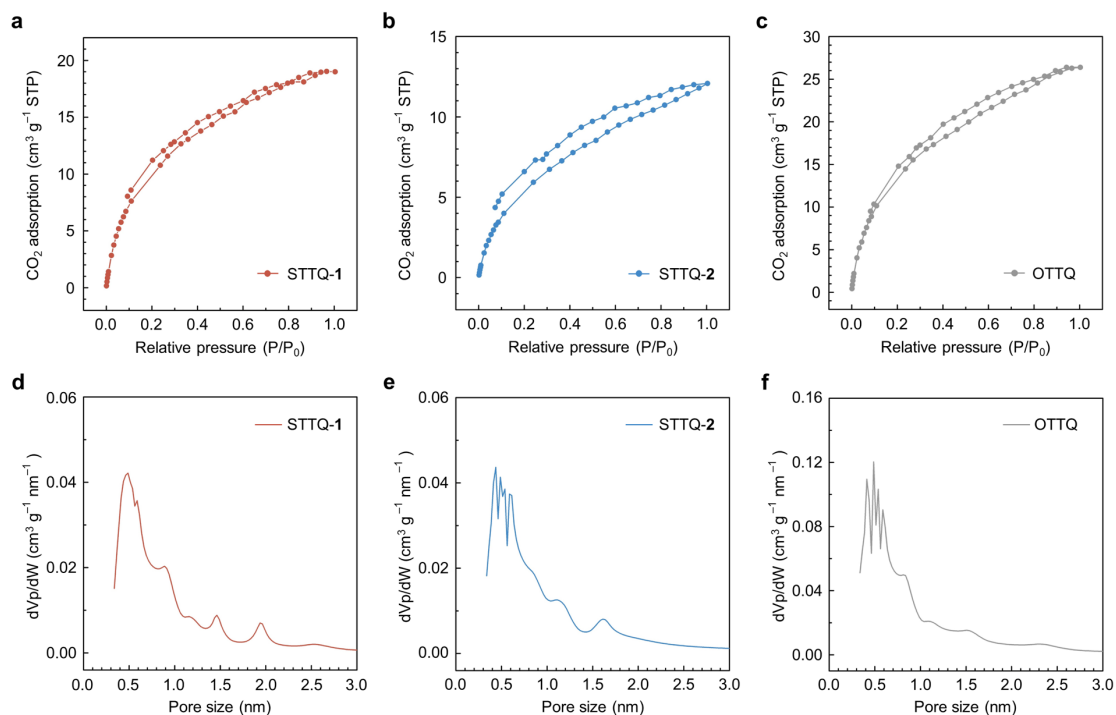

**Supplementary Fig. 5 | Evaluation on the porosity of heterocyclic TTQs.**  
CO<sub>2</sub> adsorption-desorption isotherms (a–c) and pore size distribution curves (d–f): STTQ-1 (a,d), STTQ-2 (b,e), and OTTQ (c,f).

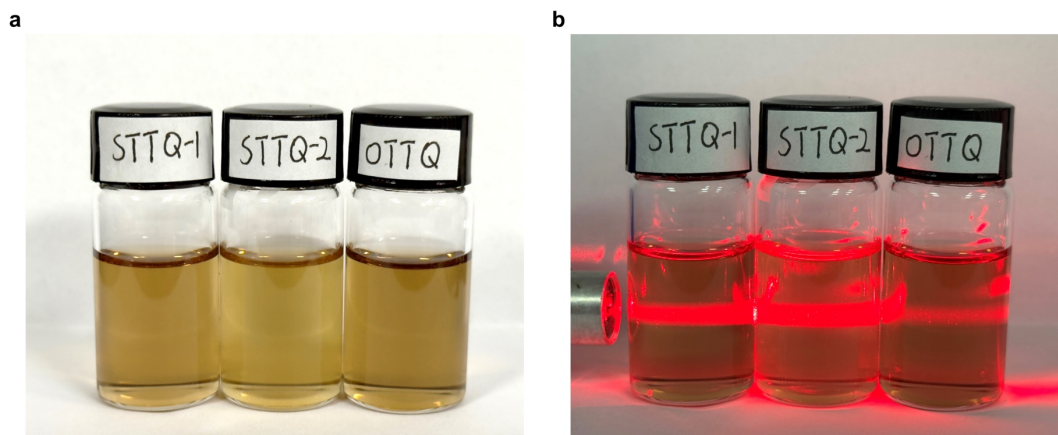

**Supplementary Fig. 6 | Evaluation on the Tyndall effect of heterocyclic TTQ dispersions.**

Photographs of the dispersions in DMF after ultrasonication at 25 °C: (a) without light scattering and (b) with light scattering by laser irradiation.

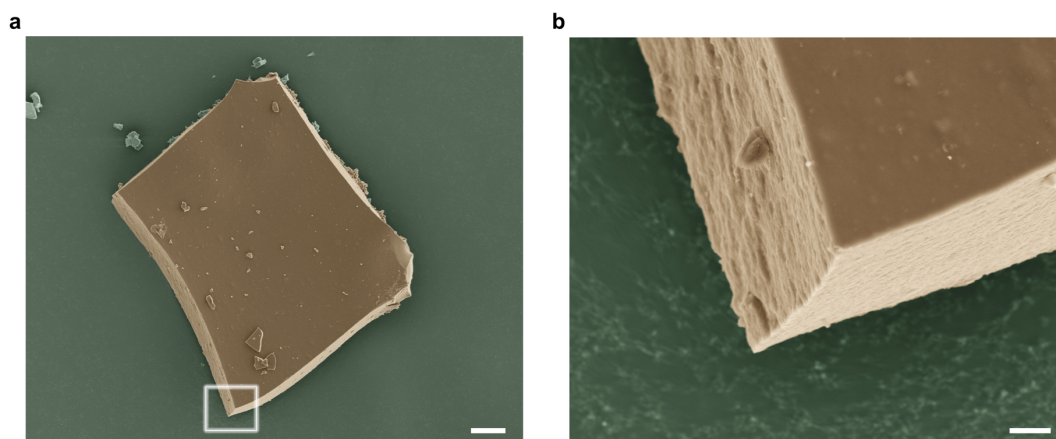

**Supplementary Fig. 7 | Compact laminar structures of STTQ-1.**

(a) Low-magnification overview. Scale bars, 20  $\mu\text{m}$ . (b) High-magnification views of selected areas marked by white boxes in a. Scale bars, 2  $\mu\text{m}$ .

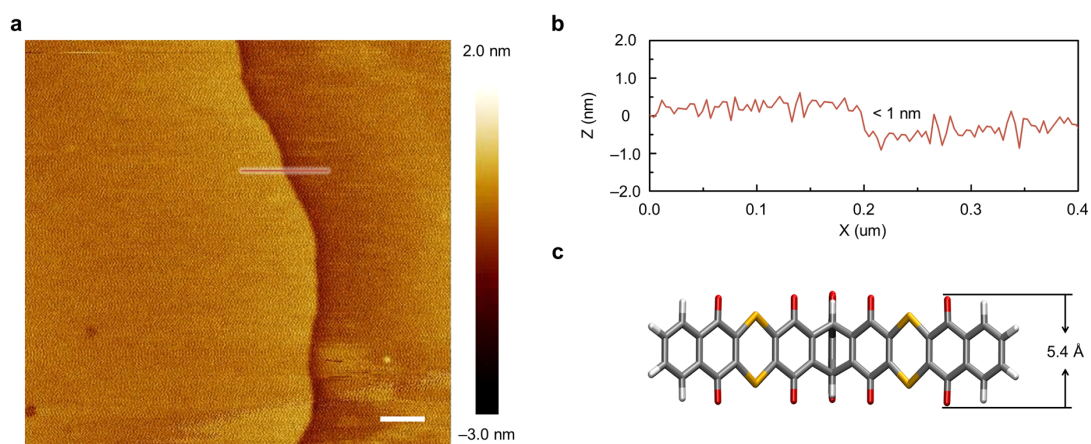

**Supplementary Fig. 8 | Nanostructure characterization of STTQ-1 monolayer nanosheets.**

Tapping-mode AFM topographical images (a) and height profiles (b) of the exfoliated monolayer nanosheets on mica substrates. Scale bar, 0.2  $\mu\text{m}$ . (c) Sticks model of STTQ-1 from side view.

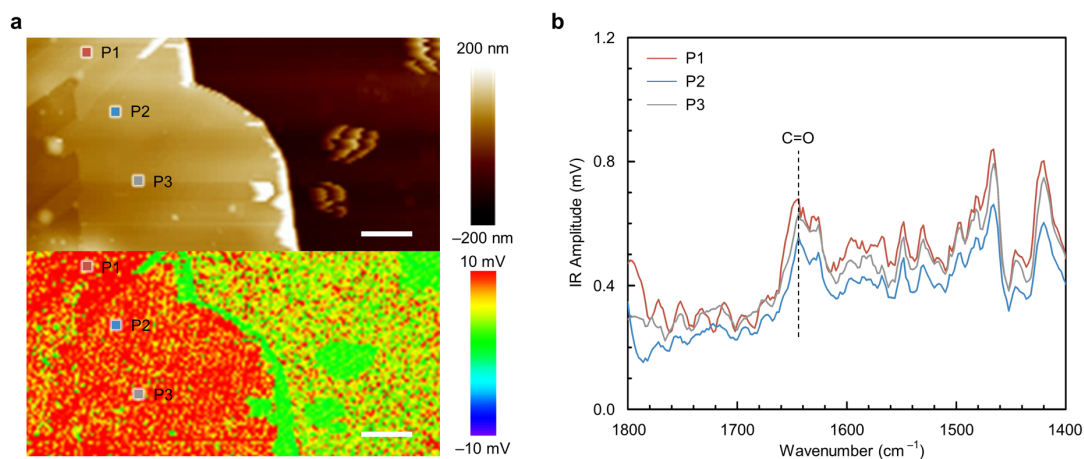

**Supplementary Fig. 9 | Evaluation on the molecular orientation of the exfoliated STTQ-1 nanosheets.**

(a) Tapping-mode AFM images (upper) and AFM-IR mapping at  $1650\text{ cm}^{-1}$  (lower) on silicon substrate. Marked points (P1–P3) indicate spectral acquisition locations. Scale bars,  $2\text{ }\mu\text{m}$ . (b) Corresponding AFM-IR spectra ( $1400\text{--}1800\text{ cm}^{-1}$ ) from P1 (red), P2 (blue), P3 (gray) in a.



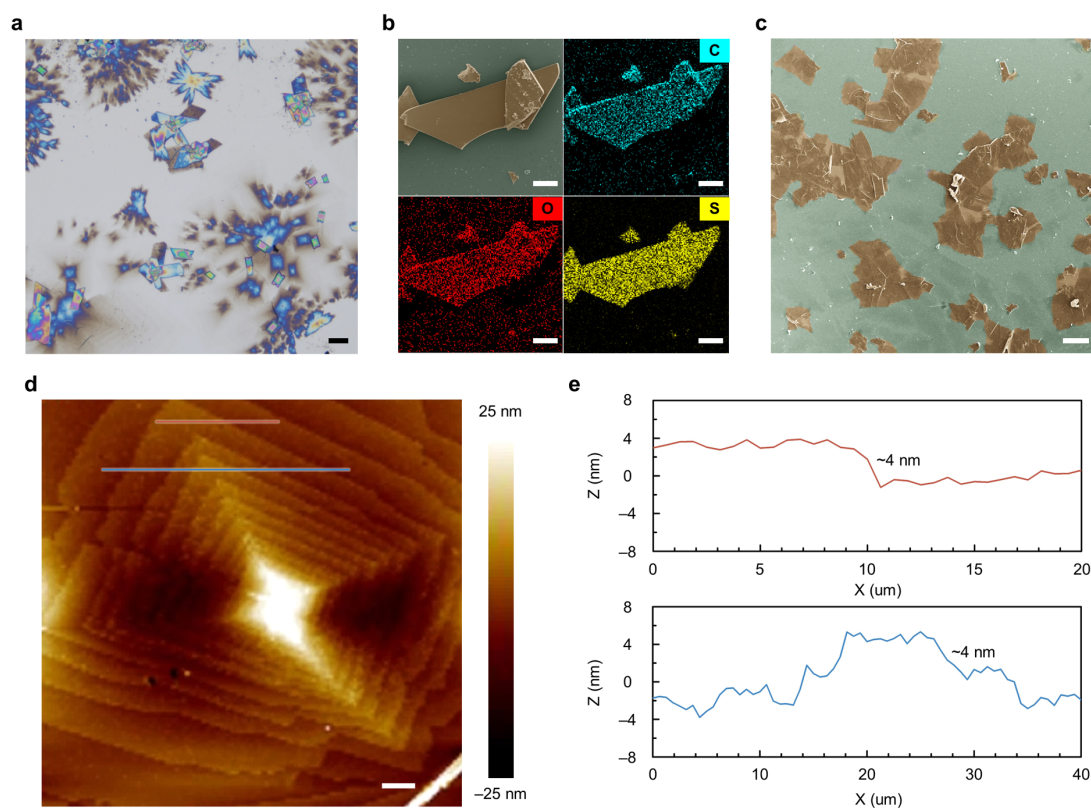

**Supplementary Fig. 10 | Morphology characterization of STTQ-2.**

(a) Reflection-mode OM image of a drop-casted sample on silicon. Scale bar, 20  $\mu\text{m}$ . (b) False-colored SEM image and corresponding EDX elemental mapping of a drop-casted sample on silicon. Scale bars, 20  $\mu\text{m}$ . (c) False-colored SEM image of exfoliated nanosheets on silicon. Scale bar, 20  $\mu\text{m}$ . (d) Tapping-mode AFM image and (e) height profile of multilayer nanosheets on silicon. Scale bar, 5  $\mu\text{m}$ .

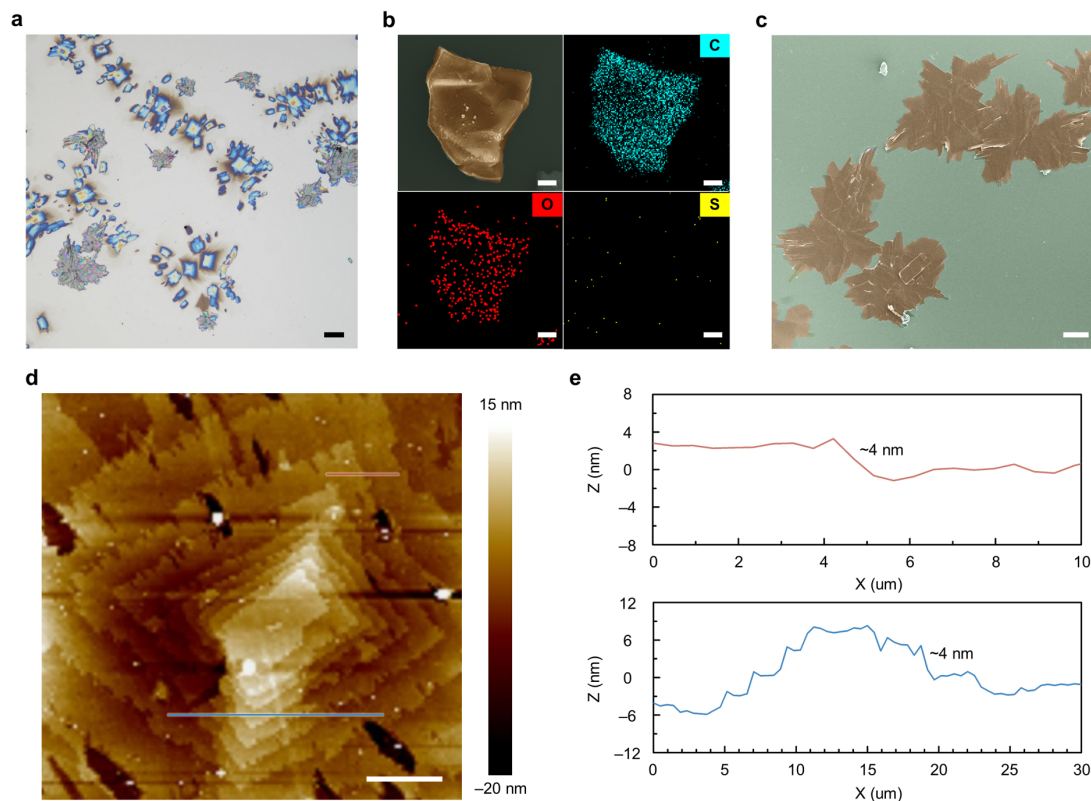

**Supplementary Fig. 11 | Morphology characterization of OTTQ.**

- (a) Reflection-mode OM image of a drop-casted sample on silicon. Scale bar, 10  $\mu\text{m}$ .  
 (b) False-colored SEM image and corresponding EDX elemental mapping of a drop-casted sample on silicon. Scale bars, 10  $\mu\text{m}$ . (c) False-colored SEM image of exfoliated nanosheets on silicon. Scale bar, 20  $\mu\text{m}$ . (d) Tapping-mode AFM image and (e) height profile of multilayer nanosheets on silicon. Scale bar, 10  $\mu\text{m}$ .

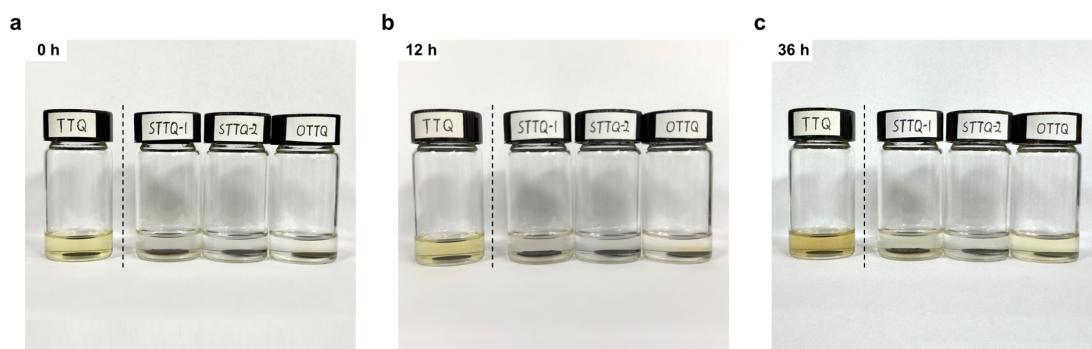

**Supplementary Fig. 12 | Evaluation on the solubility of TTQ electrodes.**

Photographs of TTQ and heterocyclic TTQs electrodes immersed in LiTFSI DOL/DME solution (1 M) observed after 0 h (a), 12 h (b), and 36 h (c). TTQ dissolved significantly with increasing immersion time, while the heterocyclic TTQs remained largely insoluble.

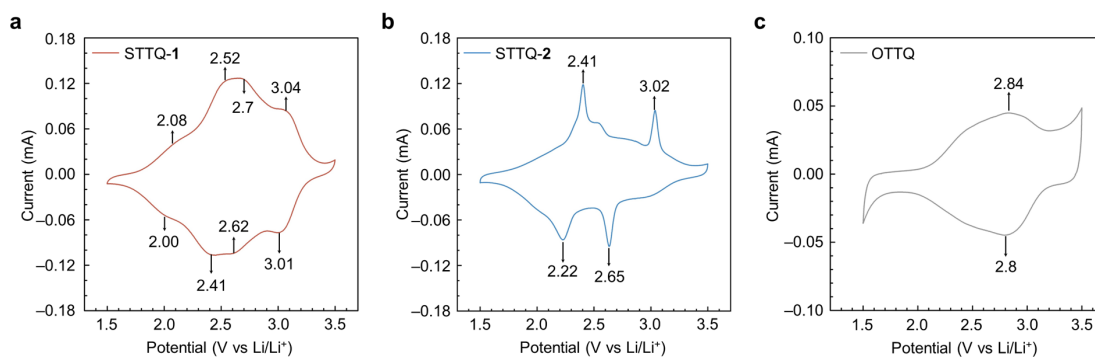

**Supplementary Fig. 13 | Cyclic voltammetry (CV) curves of heterocyclic TTQs.**  
 CV curves at a scan rate of  $0.5 \text{ mV s}^{-1}$  with redox peak potentials labeled: (a) STTQ-1, (b) STTQ-2, and (c) OTTQ.

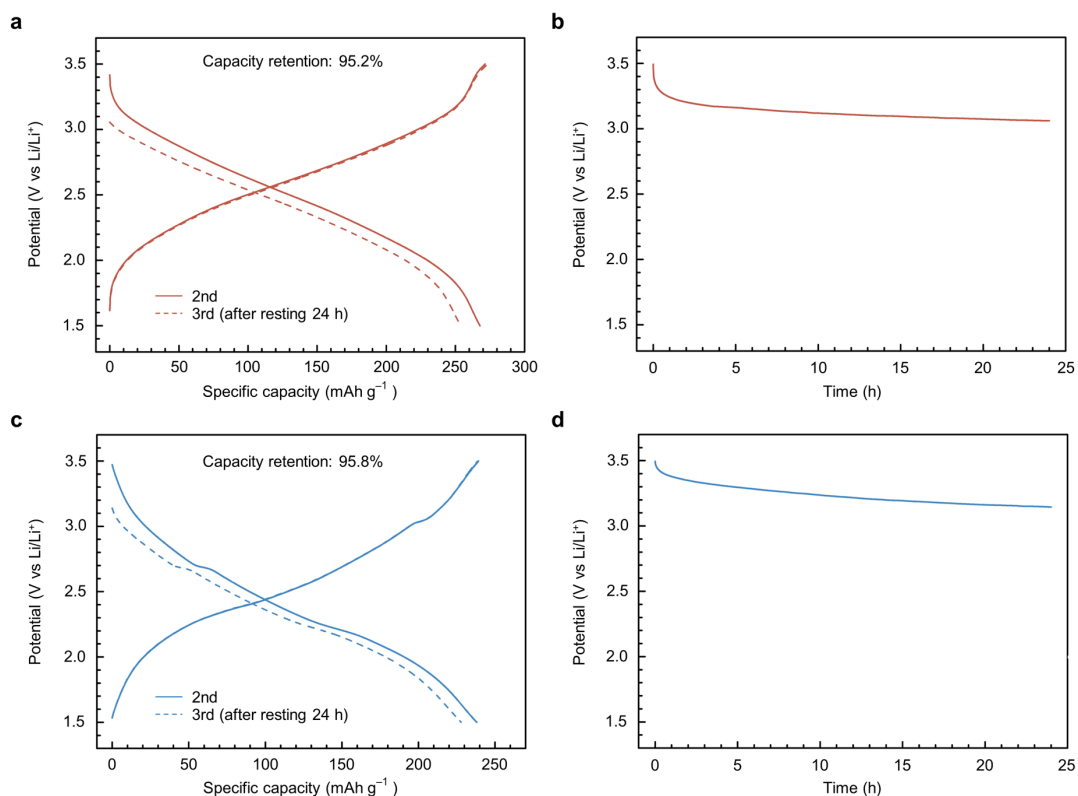

**Supplementary Fig. 14 | Evaluation on the self-discharge properties of STTQ.**

Galvanostatic charge–discharge profiles (a,c) at a current density of  $0.06 \text{ A g}^{-1}$  and voltage evolution for 24 h (b,d) at the second and third cycles: (a,b) STTQ-1 and (c,d) STTQ-2.

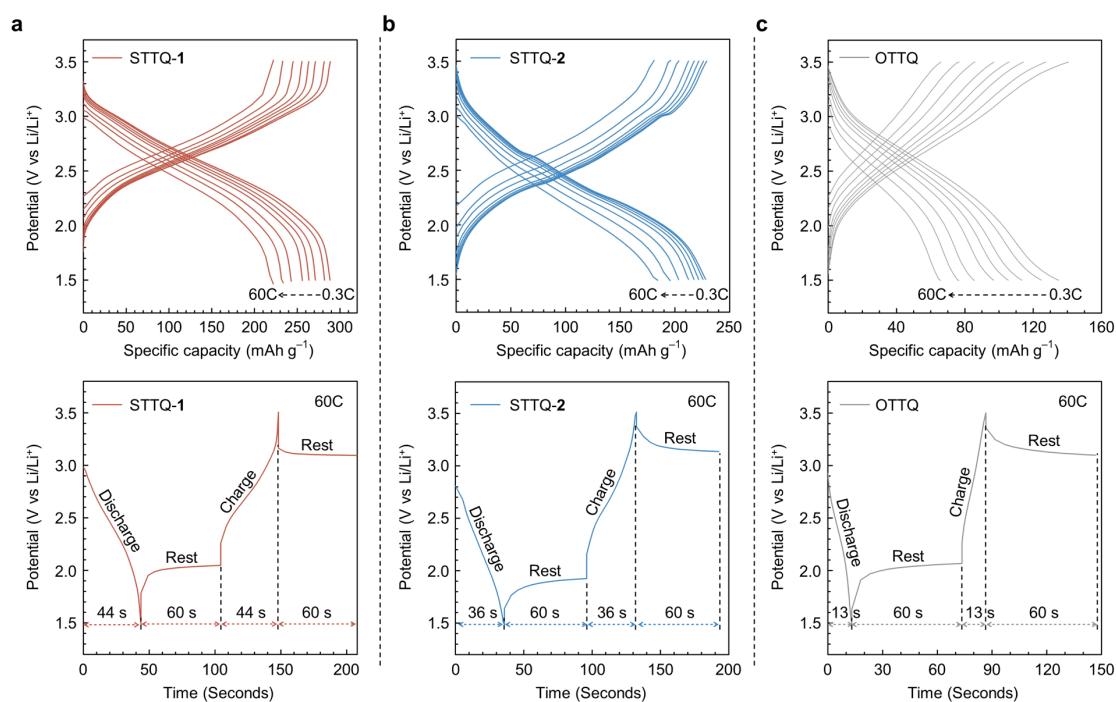

**Supplementary Fig. 15 | Evaluation on the rate performance of heterocyclic TTQs.** Galvanostatic charge–discharge profiles (upper) at 25 °C across rates from 0.3C to 60C and charge–discharge duration at 60C (lower): (a) STTQ-1, (b) STTQ-2, and (c) OTTQ.

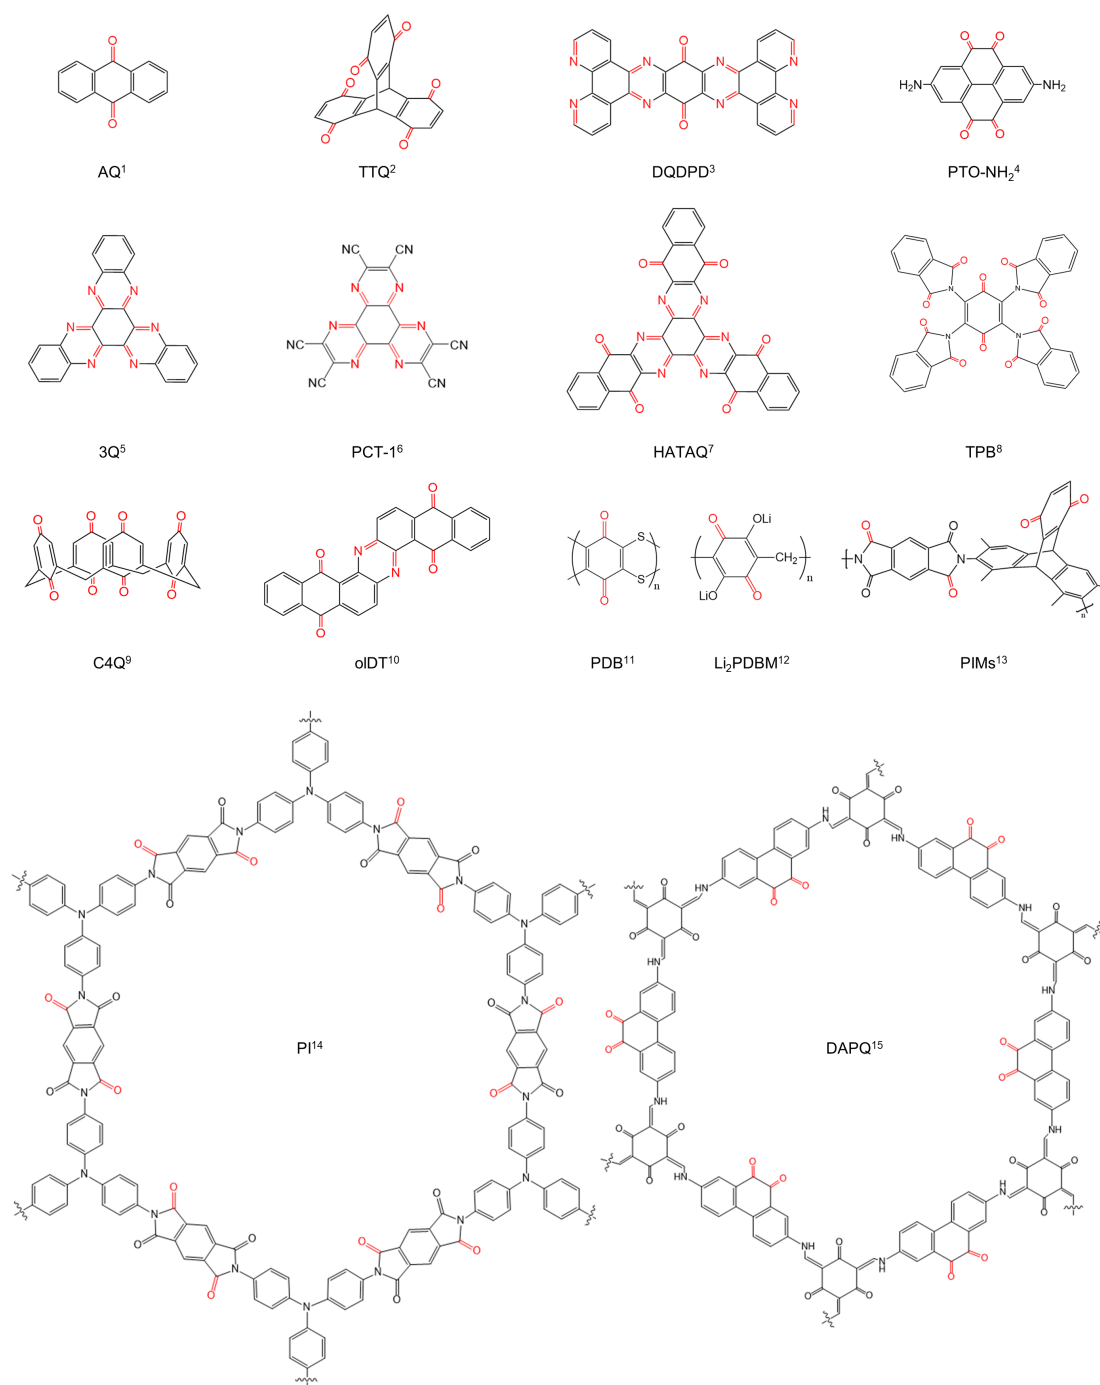

**Supplementary Fig. 16 (Continued to the subsequent page) | Representative examples of organic cathode materials.**

Molecular structures of redox-active organic materials reported in the literatures.<sup>1-15</sup>

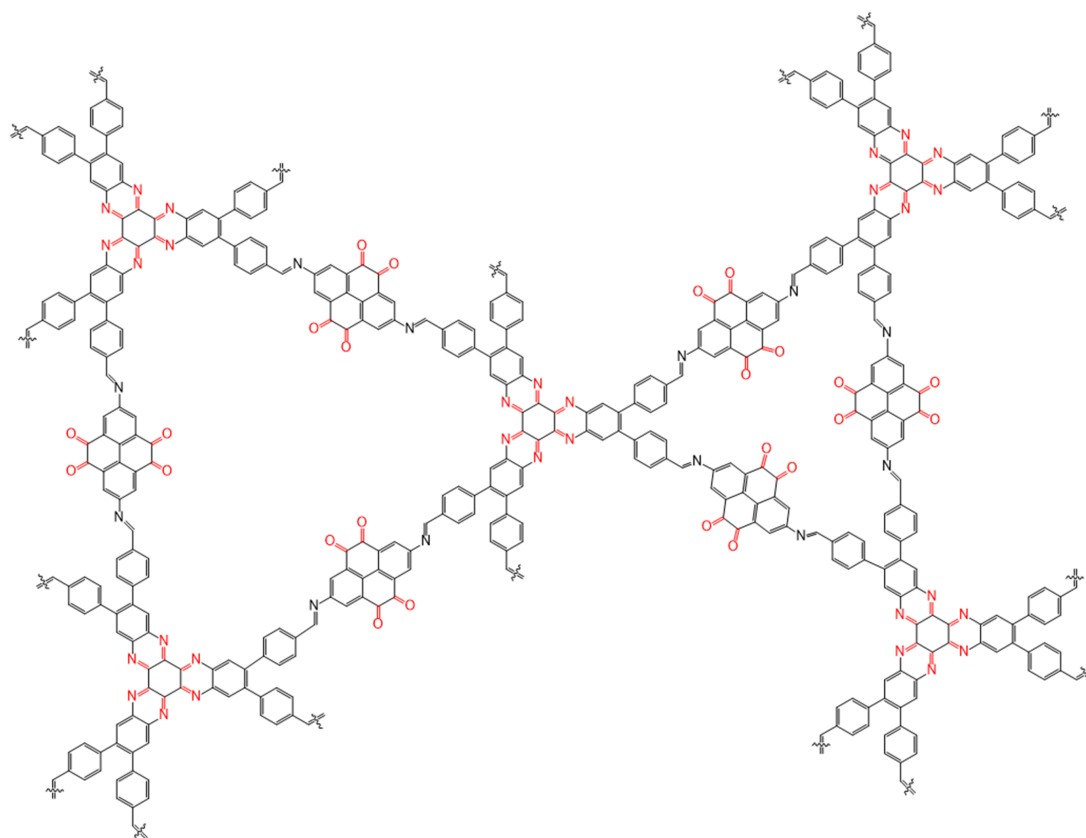

USTB<sup>16</sup>

**Supplementary Fig. 16 (Followed with the front page) | Representative examples of organic cathode materials.**

Molecular structures of redox-active organic materials reported in the literatures.<sup>16</sup>



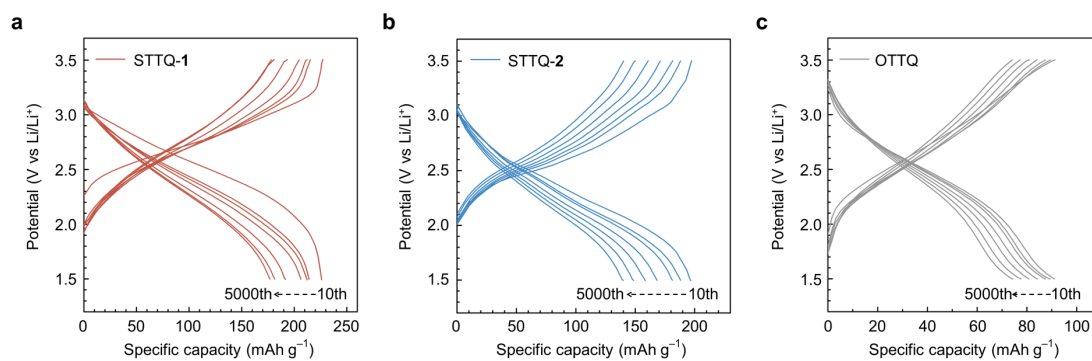

**Supplementary Fig. 17 | Evaluation on the cycling performance of heterocyclic TTQs.**

Galvanostatic charge–discharge profiles from the 10<sup>th</sup> to 5000<sup>th</sup> cycle at a current density of 4.5 A g<sup>−1</sup> (15C): (a) STTQ-1, (b) STTQ-2, and (c) OTTQ.

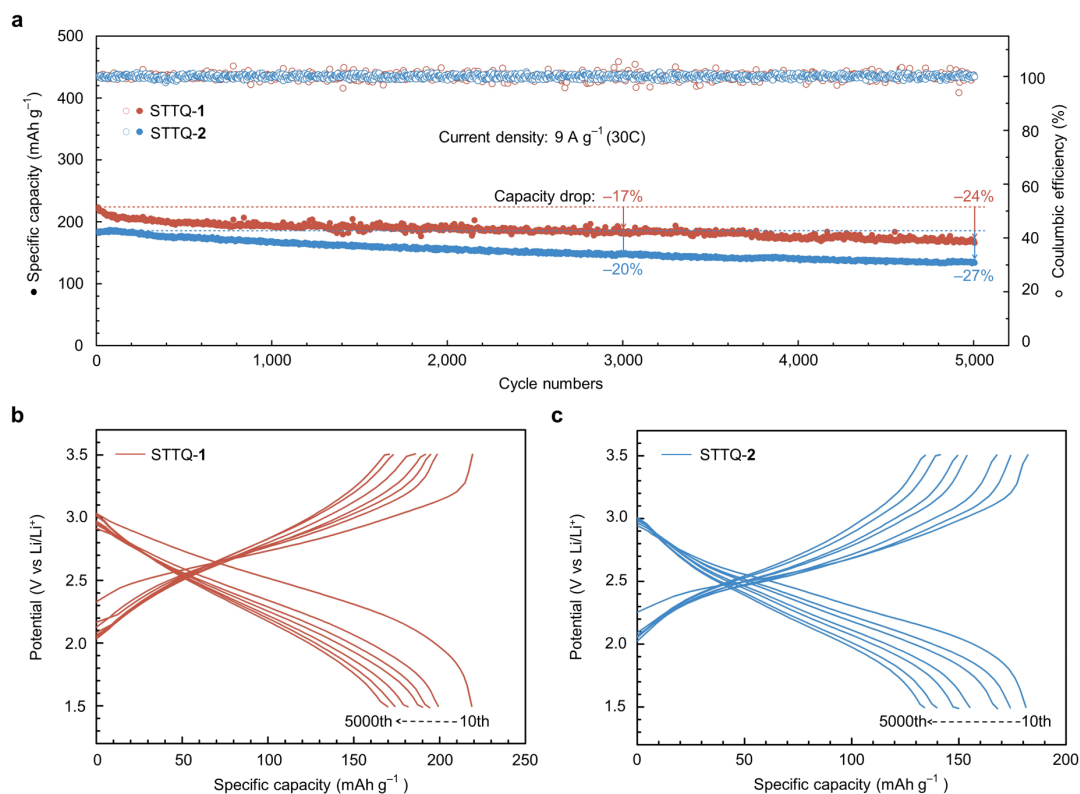

**Supplementary Fig. 18 | Evaluation on the cycling performance of STTQs.**

(a) Long-term cycling (dots) and coulombic efficiency (circles) of STTQ-1 and STTQ-2 at a current density of  $9.0 \text{ A g}^{-1}$  (30C). (b) Galvanostatic charge-discharge profiles of STTQ-1 from the 10<sup>th</sup> to 5000<sup>th</sup> cycle at a current density of  $9.0 \text{ A g}^{-1}$  (30C). (c) Galvanostatic charge-discharge profiles of STTQ-2 from the 10<sup>th</sup> to 5000<sup>th</sup> cycle at a current density of  $9.0 \text{ A g}^{-1}$  (30C).

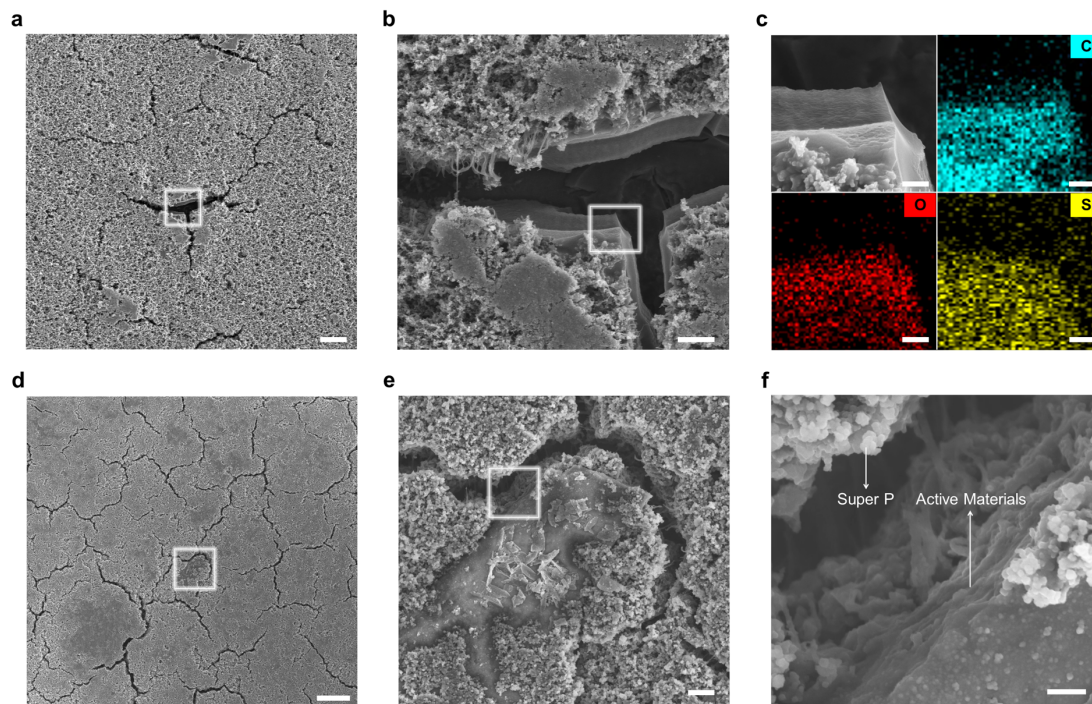

**Supplementary Fig. 19 | Characterization of morphology evolution in the STTQ-1 cathode over 2000 cycles.**

(a–c) Morphology before cycling: (a) Overview. Scale bar, 10  $\mu\text{m}$ . (b) Enlarged view of the boxed region in a. Scale bar, 2  $\mu\text{m}$ . (c) Further enlarged view of the boxed region in b with corresponding EDX elemental mapping of compact laminar structures. Scale bars, 0.5  $\mu\text{m}$ . (d–f) Morphology after cycling: (d) Overview. Scale bar, 20  $\mu\text{m}$ . (e) Enlarged view of the boxed region in d. Scale bar, 2  $\mu\text{m}$ . (f) Further enlarged view of the boxed region in e. Scale bar, 0.5  $\mu\text{m}$ .

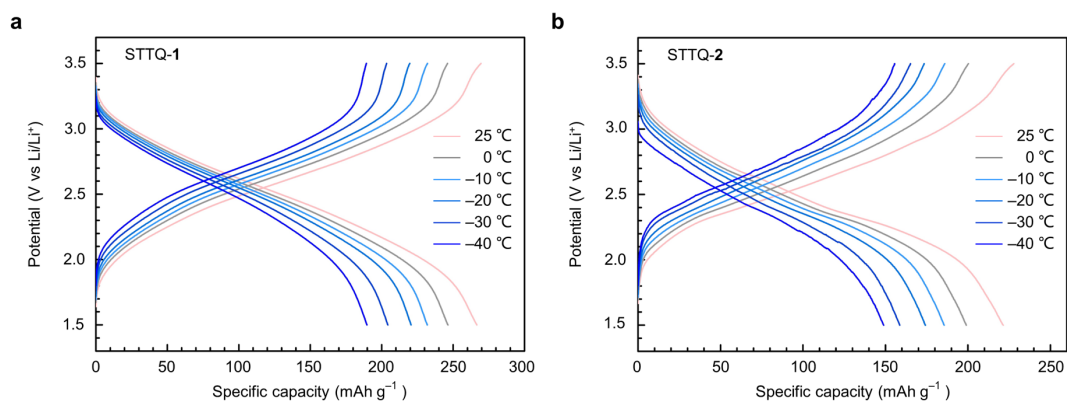

**Supplementary Fig. 20 | Evaluation on the low-temperature performance of STTQs.**

Galvanostatic charge–discharge profiles at different temperatures ranging from 25 to –40 °C: (a) STTQ-1 and (b) STTQ-2.

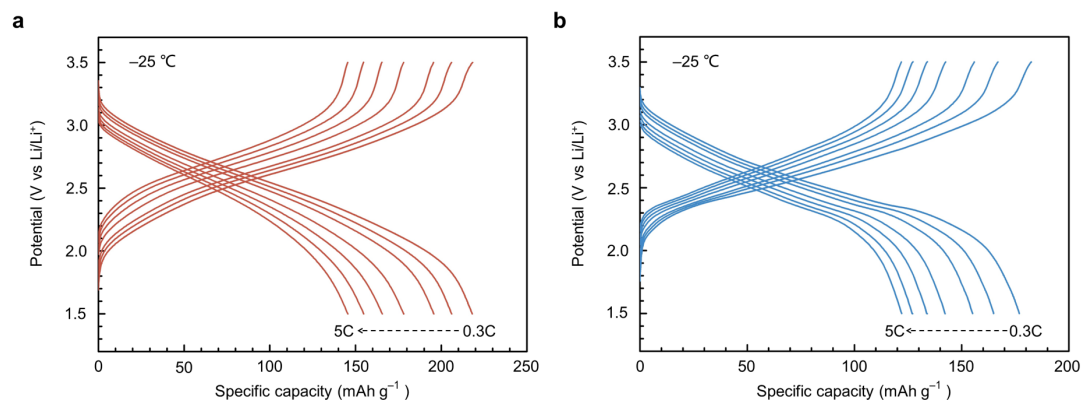

**Supplementary Fig. 21 | Evaluation on the rate performance of STTQs at low temperature.**

Galvanostatic charge–discharge profiles in a range of charge rates from 0.3C to 5C at -25 °C: (a) STTQ-1 and (b) STTQ-2.

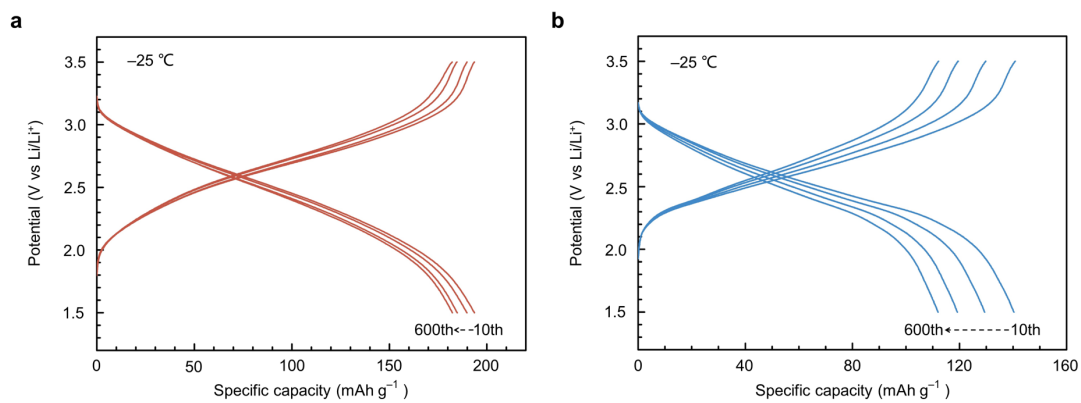

**Supplementary Fig. 22 | Evaluation on the cycling performance of STTQs at low temperature.**

Galvanostatic charge-discharge profiles from the 10<sup>th</sup> to 600<sup>th</sup> cycle at  $0.3\text{ A g}^{-1}$  and  $-25\text{ }^{\circ}\text{C}$ : (a) STTQ-1 and (b) STTQ-2.

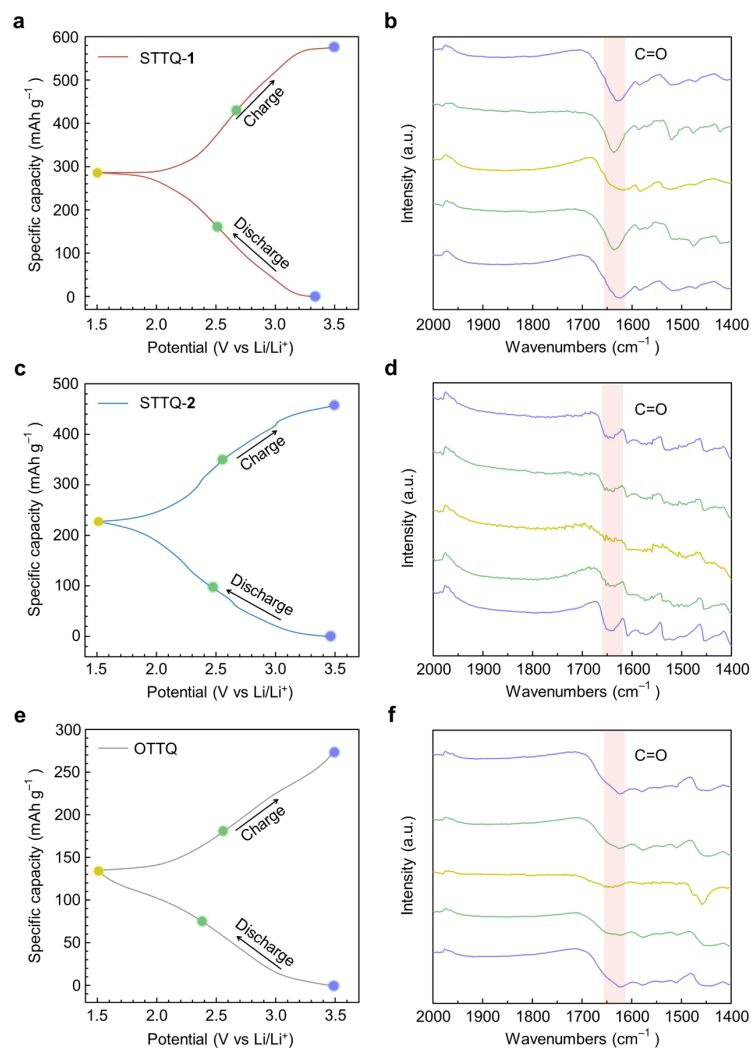

**Supplementary Fig. 23 | Identification of electroactive sites in heterocyclic TTQs.** Galvanostatic charge–discharge profiles (a,c,e) in a window of 1.5–3.5 V and ex-situ FT-IR spectra (b,d,f) of the cathodes obtained from the disassembled cells at different discharge and recharge states marked in a, c, and e: (a,b) STTQ-1, (c,d) STTQ-2 and (e,d) OTTQ.

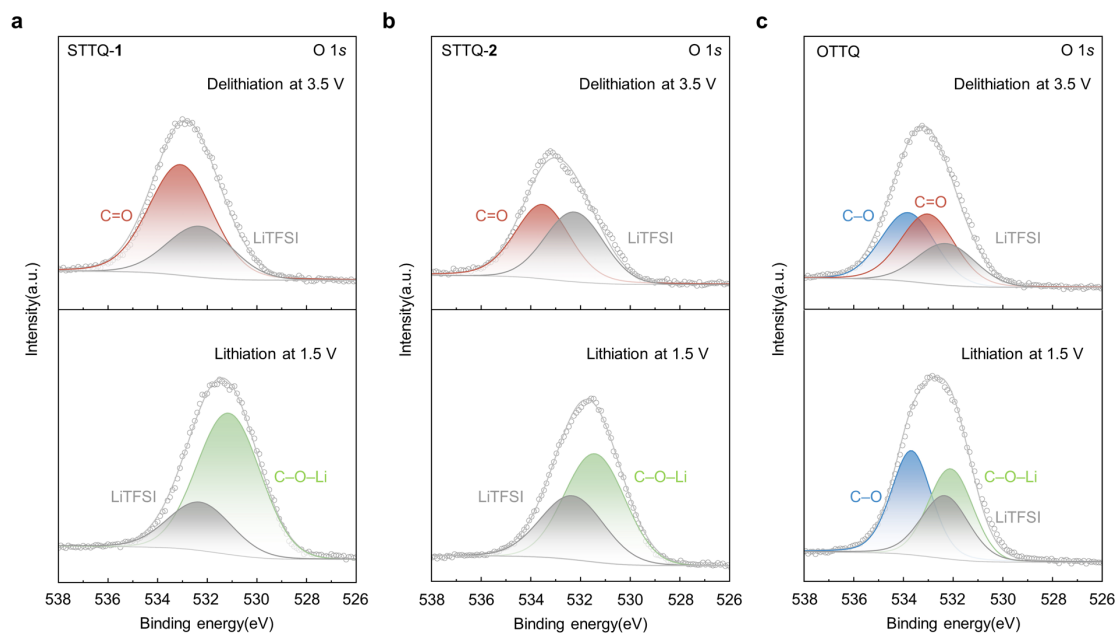

**Supplementary Fig. 24 | Identification of electroactive sites in heterocyclic TTQs.** High-resolution ex situ XPS spectra of O 1s of organic cathodes at the corresponding discharge (lithiation) and recharge (delithiation) states: (a) STTQ-1, (b) STTQ-2 and (c) OTTQ.



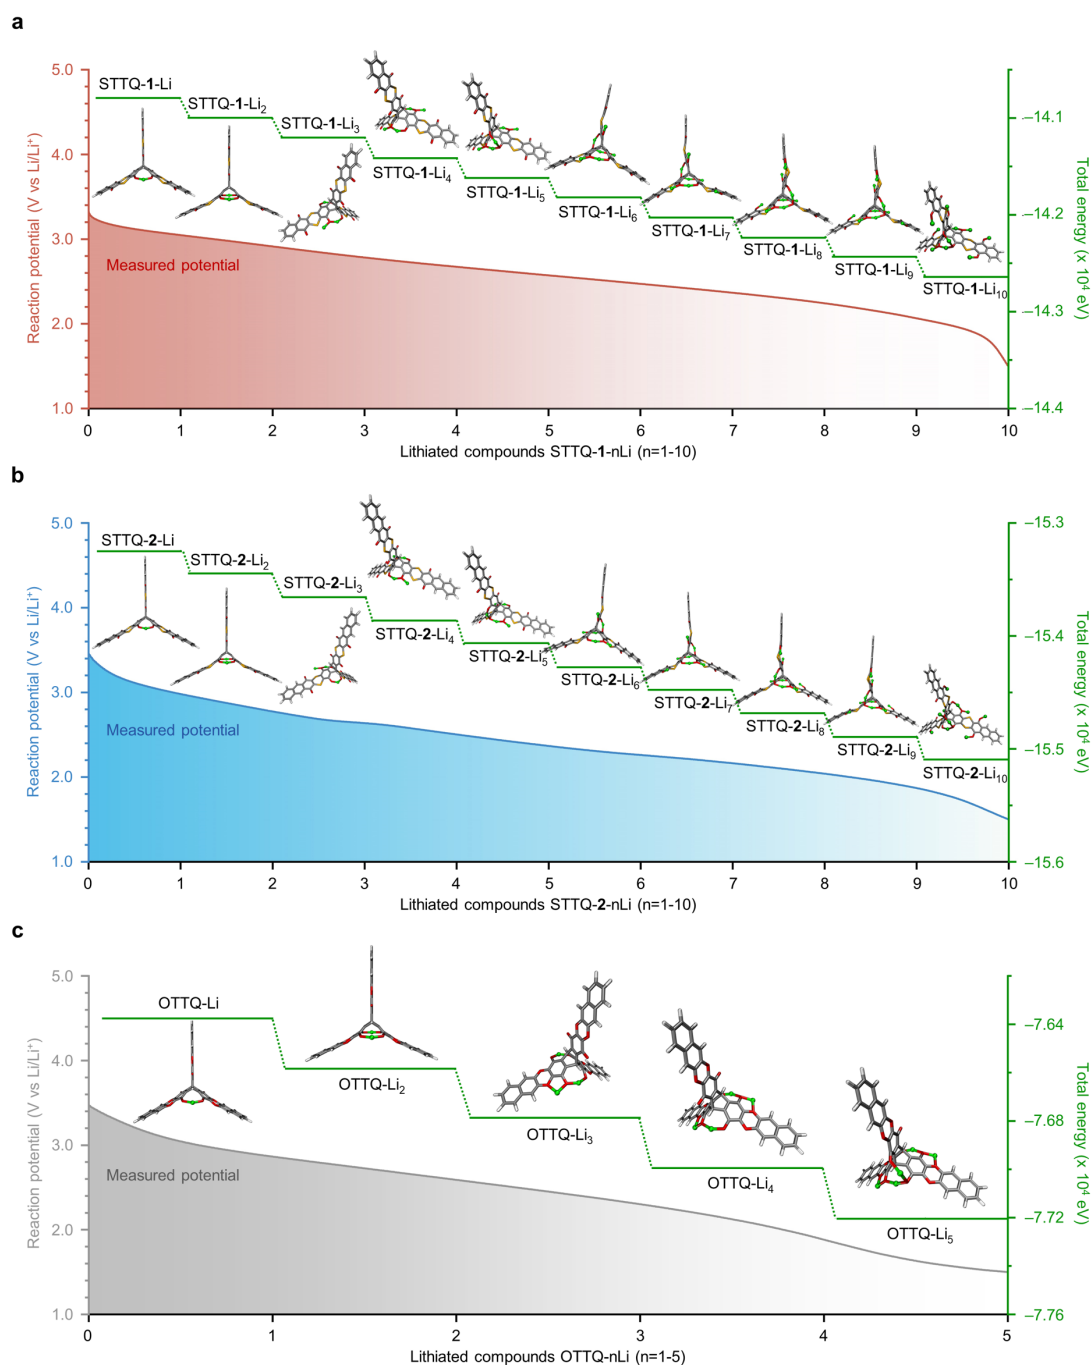

**Supplementary Fig. 25 | Calculation of the lithiation pathway in heterocyclic TTQs.** Reaction potentials versus  $\text{Li}^+/\text{Li}$  (STTQ-1: red; STTQ-2: blue; OTTQ: gray) and total energy of lithiated structures (eV), with green lines marking the most stable configuration at each lithiation stage: (a) STTQ-1, (b) STTQ-2, and (c) OTTQ.

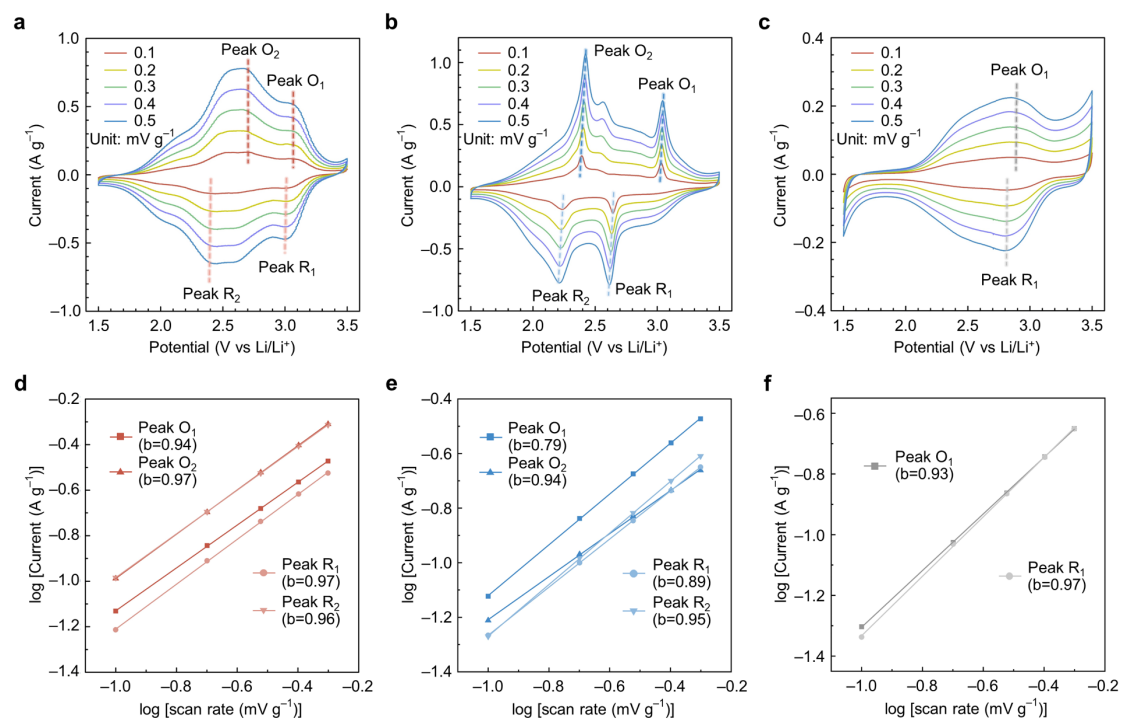

**Supplementary Fig. 26 | Evaluation on the electrochemical reaction kinetics of heterocyclic TTQs.**

(a–c) CV curves at varied scan rates (0.1–0.5  $\text{mV} \cdot \text{s}^{-1}$ ) and (d–f) Linear fitting of  $\log(i_p)$  vs.  $\log(v)$  for redox peaks ( $R^2 > 0.99$ ): (a,d) STTQ-1, (b,e) STTQ-2, and (c,f) OTTQ.

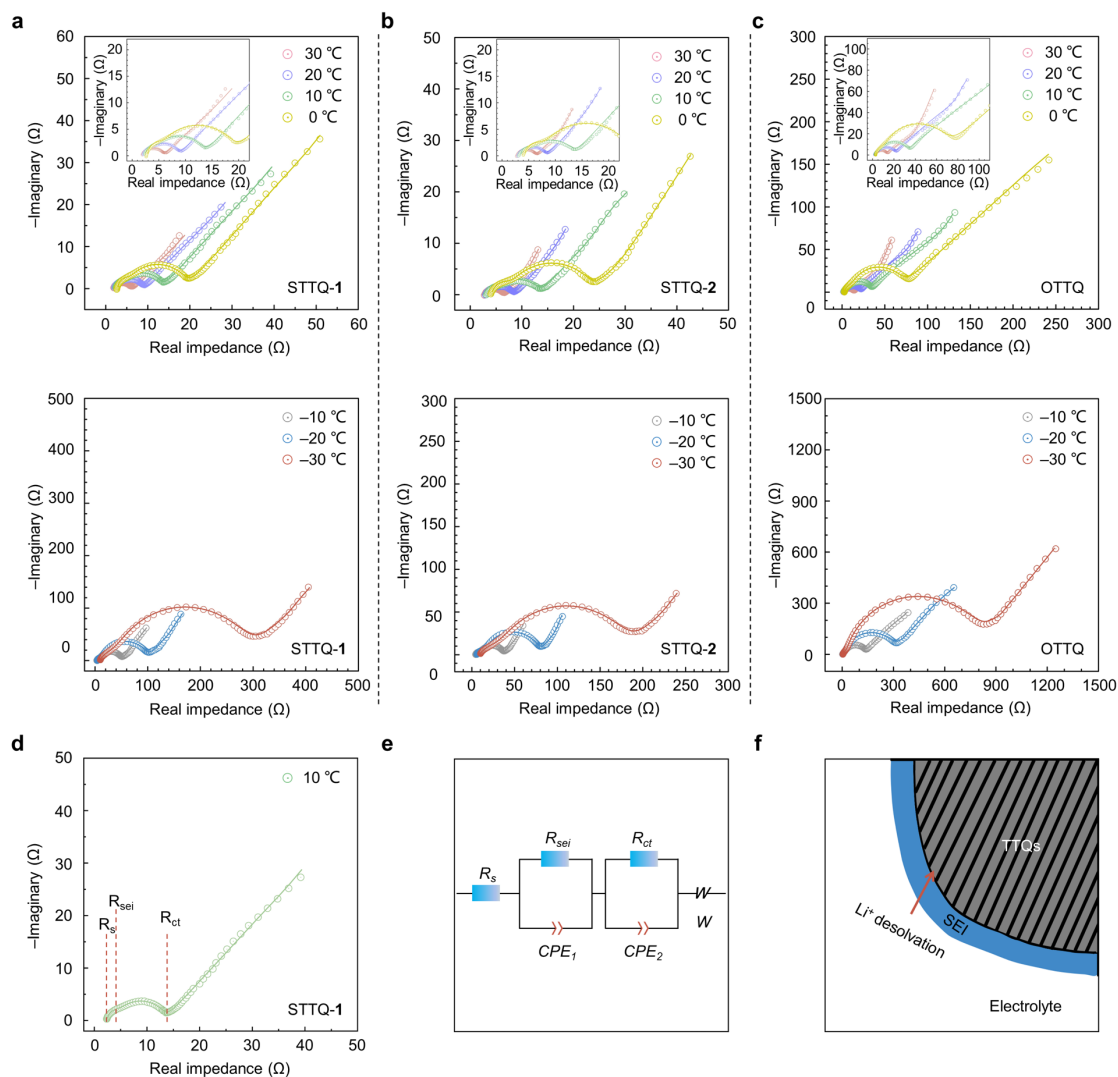

**Supplementary Fig. 27 | Evaluation on the temperature-dependent charge-transfer resistance and equivalent circuit model of heterocyclic TTQs.**

Nyquist plots and of EIS at different temperatures ranging from 30 to  $-30$   $^{\circ}\text{C}$  with fitting lines (solid): (a) STTQ-1, (b) STTQ-2, and (c) OTTQ. The equivalent circuit model (e) to fit Nyquist plot of EIS (d) obtained from half cells, where  $R_s$ ,  $R_{\text{sei}}$ , and  $R_{\text{ct}}$  stand for the resistance of the electrolyte, the  $\text{Li}^+$  migration through solid-electrolyte interface (SEI) and the desolvation process (f), respectively.

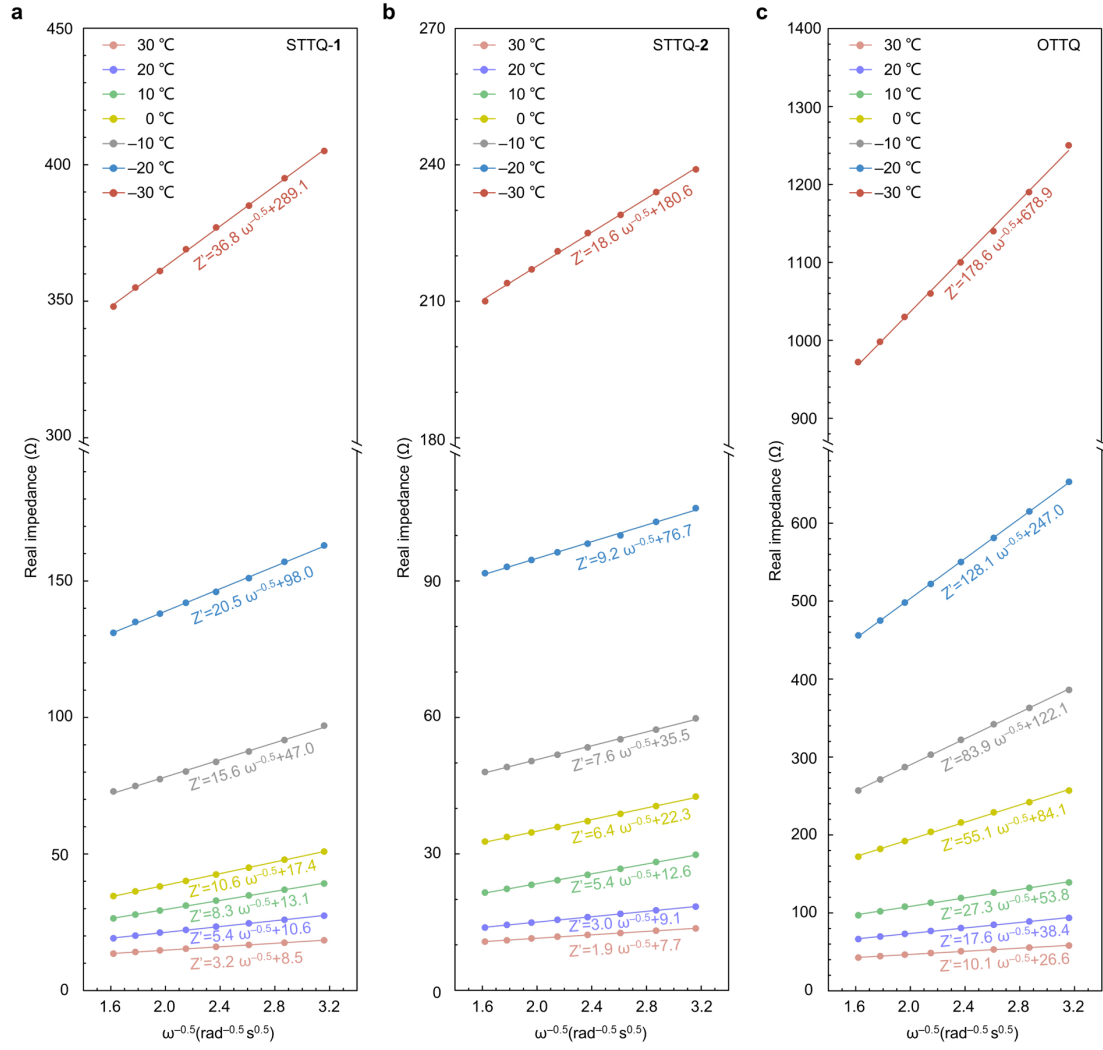

**Supplementary Fig. 28 | Evaluation on the  $\text{Li}^+$ -diffusion coefficients of TTQs at different temperatures.**

Linear fitting plots ( $R^2 > 0.99$ ) of the real part of impedance and low frequency at different temperatures ranging from 30 to  $-30\text{ }^\circ\text{C}$ : (a) STTQ-1, (b) STTQ-2, and (c) OTTQ.

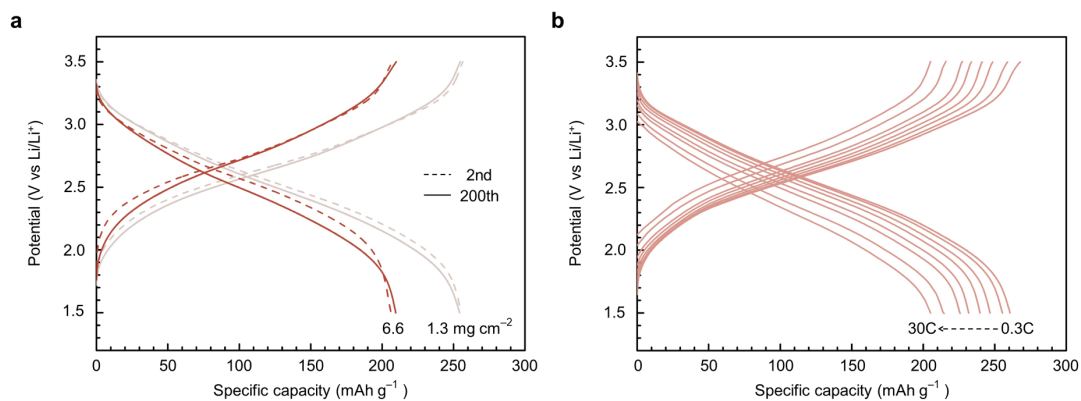

**Supplementary Fig. 29 | Evaluation on the cycling and rate performance of STTQ-1 with different mass loading.**

(a) Galvanostatic charge–discharge profiles from the 2<sup>nd</sup> to 200<sup>th</sup> cycle at 0.15 A g<sup>−1</sup> (0.5C) with different active material mass loadings: 1.3 mg cm<sup>−2</sup> (light gray), 6.6 mg cm<sup>−2</sup> (red). (b) Galvanostatic charge–discharge profiles at 25 °C with active material mass loading of 2 mg cm<sup>−2</sup> across rates of 0.3C to 30C.

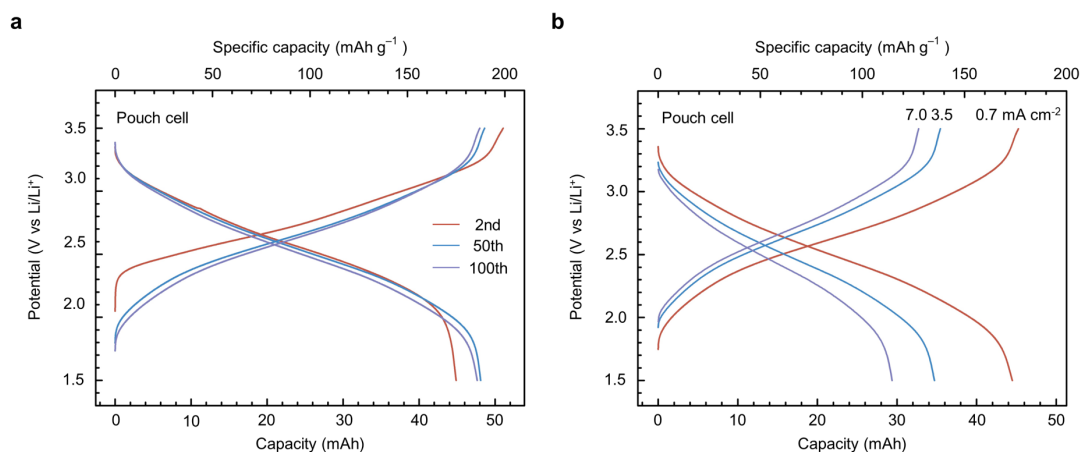

**Supplementary Fig. 30 | Evaluation on the cycling and rate performance of pouch cell.**

(a) Galvanostatic charge–discharge profiles from the 2<sup>nd</sup> to 100<sup>th</sup> cycle at 0.7 mA cm<sup>-2</sup> with active material mass loading of 6 mg cm<sup>-2</sup>. (b) Galvanostatic charge–discharge profiles at 25 °C with active material mass loading of 6 mg cm<sup>-2</sup> from 0.7 mA cm<sup>-2</sup> to 7 mA cm<sup>-2</sup>.

### 3. Supplementary Tables

**Supplementary Table 1 | Electrochemical performance of TTQs and the reported small molecules cathode materials**

| Materials           | Current density<br>(mA g <sup>-1</sup> ) | Specific capacity<br>(mAh g <sup>-1</sup> ) | Average voltage<br>(V) | Energy density<br>(Wh kg <sup>-1</sup> ) | Power density<br>(W kg <sup>-1</sup> ) | Cycle number<br>/ Capacity retention (%) | Reference |
|---------------------|------------------------------------------|---------------------------------------------|------------------------|------------------------------------------|----------------------------------------|------------------------------------------|-----------|
| AQ                  | 20                                       | 183                                         | 2.4                    | 440                                      | 48                                     | 100 / 60                                 | (1)       |
|                     | 200                                      | 90                                          | 2.3                    | 207                                      | 460                                    |                                          |           |
| TTQ                 | 400                                      | 250                                         | 2.6                    | 650                                      | 1040                                   | 100 / 65                                 | (2)       |
| DQDPD               | 5000                                     | 343                                         | 2.0                    | 686                                      | 10000                                  | 3000/82                                  | (3)       |
| PTO-NH <sub>2</sub> | 50                                       | 350                                         | 2.4                    | 840                                      | 120                                    | 100 / 83                                 | (4)       |
| 3Q                  | 8000                                     | 147                                         | 1.8                    | 264                                      | 14400                                  | 10000 / 65                               | (5)       |
| PCT-1               | 500                                      | 290                                         | 2.2                    | 638                                      | 1100                                   | 100 / 48                                 | (6)       |
|                     | 2000                                     | 270                                         | 2.0                    | 540                                      | 4000                                   |                                          |           |
| HATAQ               | 10000                                    | 209                                         | 2.2                    | 459.8                                    | 22000                                  | 1000 / 85                                | (7)       |
| TPB                 | 47                                       | 223                                         | 2.3                    | 513                                      | 108                                    | 100 / 91                                 | (8)       |
| C4Q                 | 85                                       | 422                                         | 2.5                    | 1055                                     | 213                                    | 100 / 89                                 | (9)       |
|                     | 446                                      | 218                                         | 2.3                    | 500                                      | 1077                                   |                                          |           |
| OLDT                | 500                                      | 272                                         | 2.3                    | 626                                      | 1150                                   | 1000 / 76                                | (10)      |
|                     | 5000                                     | 161                                         | 2.0                    | 322                                      | 10000                                  |                                          |           |
| STTQ-1              | 60                                       | 288                                         | 2.56                   | 738                                      | 230                                    | 5000 / 79                                | This work |
|                     | 4500                                     | 241                                         | 2.49                   | 600                                      | 11179                                  |                                          |           |
|                     | 18000                                    | 218                                         | 2.39                   | 521                                      | 42932                                  |                                          |           |
| STTQ-2              | 60                                       | 239                                         | 2.46                   | 587                                      | 216                                    | 5000 / 71                                | This work |
|                     | 4500                                     | 203                                         | 2.35                   | 478                                      | 10540                                  |                                          |           |
|                     | 18000                                    | 180                                         | 2.24                   | 403                                      | 40260                                  |                                          |           |
| OTTQ                | 60                                       | 135                                         | 2.41                   | 325                                      | 216                                    | 5000 / 81.1                              | This work |
|                     | 4500                                     | 86                                          | 2.36                   | 203                                      | 10675                                  |                                          |           |
|                     | 18000                                    | 66                                          | 2.26                   | 149                                      | 40600                                  |                                          |           |

**Supplementary Table 2 | Electrochemical performance of TTQs and the reported polymeric cathode materials**

| Materials            | Current density<br>(mA g <sup>-1</sup> ) | Specific capacity<br>(mAh g <sup>-1</sup> ) | Average voltage<br>(V) | Energy density<br>(Wh kg <sup>-1</sup> ) | Power density<br>(W kg <sup>-1</sup> ) | Cycle number<br>/ Capacity retention (%) | Reference |
|----------------------|------------------------------------------|---------------------------------------------|------------------------|------------------------------------------|----------------------------------------|------------------------------------------|-----------|
| PDB                  | 20                                       | 255                                         | 2.45                   | 624                                      | 50                                     | 1000 / 81                                | (11)      |
|                      | 1500                                     | 161                                         | 2.49                   | 401                                      | 3346                                   |                                          |           |
| Li <sub>2</sub> PDBM | 50                                       | 251                                         | 1.90                   | 477                                      | 95                                     | 2000 / 77                                | (12)      |
|                      | 2000                                     | 198                                         | 1.70                   | 337                                      | 3400                                   |                                          |           |
| PIM                  | 38                                       | 181                                         | 2.45                   | 444                                      | 93                                     | 1400 / 99                                | (13)      |
| PI                   | 14                                       | 110                                         | 2.20                   | 242                                      | 31                                     | 300 / 70.7                               | (14)      |
| DAPQ                 | 500                                      | 162                                         | 2.52                   | 408                                      | 1260                                   | 3000 / 76.0                              | (15)      |
| USTB                 | 150                                      | 233                                         | 2.20                   | 513                                      | 330                                    | 6000 / 70                                | (16)      |
|                      | 3000                                     | 187                                         | 2.14                   | 400                                      | 6420                                   |                                          |           |
| BQ1                  | 39                                       | 504                                         | 2.05                   | 1033                                     | 79                                     | 1000 / 81                                | (17)      |
|                      | 7730                                     | 171                                         | 1.75                   | 350                                      | 12600                                  |                                          |           |
| STTQ-1               | 60                                       | 288                                         | 2.56                   | 738                                      | 230                                    | 5000 / 79                                | This work |
|                      | 4500                                     | 241                                         | 2.49                   | 600                                      | 11179                                  |                                          |           |
|                      | 18000                                    | 218                                         | 2.39                   | 521                                      | 42932                                  |                                          |           |
| STTQ-2               | 60                                       | 239                                         | 2.46                   | 587                                      | 216                                    | 5000 / 71                                | This work |
|                      | 4500                                     | 203                                         | 2.35                   | 478                                      | 10540                                  |                                          |           |
|                      | 18000                                    | 180                                         | 2.24                   | 403                                      | 40260                                  |                                          |           |
| OTTQ                 | 60                                       | 135                                         | 2.41                   | 325                                      | 216                                    | 5000 / 81.1                              | This work |
|                      | 4500                                     | 86                                          | 2.36                   | 203                                      | 10675                                  |                                          |           |
|                      | 18000                                    | 66                                          | 2.26                   | 149                                      | 40600                                  |                                          |           |



**Supplementary Table 3 | Electrochemical performance of TTQs and the reported inorganic cathode materials**

| Materials                        | Current density<br>(mA g <sup>-1</sup> ) | Specific capacity<br>(mAh g <sup>-1</sup> ) | Average voltage<br>(V) | Energy density<br>(Wh kg <sup>-1</sup> ) | Power density<br>(W kg <sup>-1</sup> ) | Cycle number / Capacity retention (%) | Reference |
|----------------------------------|------------------------------------------|---------------------------------------------|------------------------|------------------------------------------|----------------------------------------|---------------------------------------|-----------|
| LiMn <sub>2</sub> O <sub>4</sub> | 10                                       | 103                                         | 4.05                   | 418                                      | 41                                     | 100 / 97                              | (18)      |
|                                  | 200                                      | 94                                          | 3.85                   | 363                                      | 770                                    |                                       |           |
| LiCoO <sub>2</sub>               | 28                                       | 157                                         | 3.90                   | 612                                      | 109                                    | 200 / 81                              | (19)      |
|                                  | 420                                      | 139                                         | 3.60                   | 500                                      | 1512                                   |                                       |           |
| NCM <sub>811</sub>               | 40                                       | 187                                         | 3.84                   | 718                                      | 154                                    | 200 / 73                              | (20)      |
|                                  | 2000                                     | 85                                          | 3.34                   | 284                                      | 6684                                   |                                       |           |
| LiFePO <sub>4</sub>              | 32                                       | 159                                         | 3.34                   | 531                                      | 107                                    | 1000 / 95                             | (21)      |
|                                  | 1600                                     | 141                                         | 2.75                   | 387                                      | 4400                                   |                                       |           |
| NCA                              | 40                                       | 202                                         | 3.83                   | 774                                      | 153                                    | 1000 / 84                             | (22)      |
| TiS <sub>2</sub>                 | 100                                      | 205                                         | 2.14                   | 439                                      | 214                                    | 200 / 84                              | (23)      |
|                                  | 60                                       | 288                                         | 2.56                   | 738                                      | 230                                    |                                       |           |
| STTQ-1                           | 4500                                     | 241                                         | 2.49                   | 600                                      | 11179                                  | 5000 / 79                             | This work |
|                                  | 18000                                    | 218                                         | 2.39                   | 521                                      | 42932                                  |                                       |           |
| STTQ-2                           | 60                                       | 239                                         | 2.46                   | 587                                      | 216                                    | 5000 / 71                             | This work |
|                                  | 4500                                     | 203                                         | 2.35                   | 478                                      | 10540                                  |                                       |           |
| OTTQ                             | 18000                                    | 180                                         | 2.24                   | 403                                      | 40260                                  | 5000 / 81.1                           | This work |
|                                  | 60                                       | 135                                         | 2.41                   | 325                                      | 216                                    |                                       |           |
| OTTQ                             | 4500                                     | 86                                          | 2.36                   | 203                                      | 10675                                  | 5000 / 81.1                           | This work |
|                                  | 18000                                    | 66                                          | 2.26                   | 149                                      | 40600                                  |                                       |           |

**Supplementary Table 4 | Low-temperature performance of TTQs and the reported cathode materials**

| Materials                                                                | Current density<br>(mA g <sup>-1</sup> ) | Temperature<br>(°C) | Capacity<br>(mAh g <sup>-1</sup> ) | Capacity retention<br>(%) | Reference |
|--------------------------------------------------------------------------|------------------------------------------|---------------------|------------------------------------|---------------------------|-----------|
| LiNi <sub>1/3</sub> Co <sub>1/3</sub> Mn <sub>1/3</sub> O <sub>2</sub>   | 16                                       | -40                 | 74                                 | 45                        | (24)      |
| LiCoO <sub>2</sub>                                                       | 10                                       | -50                 | 82                                 | 60                        | (25)      |
| LiNi <sub>0.8</sub> Co <sub>0.15</sub> Al <sub>0.05</sub> O <sub>2</sub> | 10                                       | -85                 | 76                                 | 50                        | (26)      |
| Li <sub>3</sub> V <sub>2</sub> (PO <sub>4</sub> ) <sub>3</sub>           | 26                                       | -30                 | 90                                 | 80                        | (27)      |
| Polyimide (PI)                                                           | 36                                       | -70                 | 84                                 | 69                        | (28)      |
| Polytriphenylamine                                                       | 50                                       | -70                 | 69                                 | 70                        | (29)      |
| CCP                                                                      | 100                                      | -60                 | 78                                 | 32                        | (30)      |
| CAP                                                                      | 100                                      | -60                 | 163                                | 70                        | (30)      |
| STTQ-1                                                                   | 150                                      | -40                 | 191                                | 71                        | This work |
| STTQ-2                                                                   | 150                                      | -40                 | 148                                | 71                        | This work |

**Supplementary Table 5 | Li<sup>+</sup>-diffusion coefficients ( $D_{\text{Li}^+}$ ) of TTQs at different temperatures**

| Materials | Temperature<br>(°C) | $\sigma_w$<br>( $\Omega \text{ rad}^{0.5} \text{ s}^{-0.5}$ ) | $D_{\text{Li}^+}$<br>( $\text{cm}^2 \text{ s}^{-1}$ ) |
|-----------|---------------------|---------------------------------------------------------------|-------------------------------------------------------|
| STTQ-1    | 30                  | 3.2                                                           | $2.90 \times 10^{-9}$                                 |
|           | 20                  | 5.4                                                           | $9.42 \times 10^{-10}$                                |
|           | 10                  | 8.3                                                           | $3.61 \times 10^{-10}$                                |
|           | 0                   | 10.6                                                          | $2.06 \times 10^{-10}$                                |
|           | −10                 | 15.6                                                          | $8.82 \times 10^{-10}$                                |
|           | −20                 | 20.5                                                          | $4.74 \times 10^{-10}$                                |
|           | −30                 | 36.8                                                          | $1.36 \times 10^{-11}$                                |
| STTQ-2    | 30                  | 1.9                                                           | $8.07 \times 10^{-9}$                                 |
|           | 20                  | 3.0                                                           | $3.07 \times 10^{-9}$                                 |
|           | 10                  | 5.4                                                           | $8.55 \times 10^{-10}$                                |
|           | 0                   | 6.4                                                           | $5.73 \times 10^{-10}$                                |
|           | −10                 | 7.6                                                           | $3.73 \times 10^{-10}$                                |
|           | −20                 | 9.2                                                           | $2.39 \times 10^{-10}$                                |
|           | −30                 | 18.6                                                          | $5.34 \times 10^{-11}$                                |
| OTTQ      | 30                  | 10.1                                                          | $2.82 \times 10^{-10}$                                |
|           | 20                  | 17.6                                                          | $8.64 \times 10^{-11}$                                |
|           | 10                  | 27.3                                                          | $3.36 \times 10^{-11}$                                |
|           | 0                   | 55.1                                                          | $7.65 \times 10^{-12}$                                |
|           | −10                 | 83.9                                                          | $3.07 \times 10^{-12}$                                |
|           | −20                 | 128.1                                                         | $1.22 \times 10^{-12}$                                |
|           | −30                 | 178.6                                                         | $5.78 \times 10^{-13}$                                |

#### 4. Supplementary References

1. Li, W. et al. All-solid-state secondary lithium battery using solid polymer electrolyte and anthraquinone cathode. *Solid State Ion.* **300**, 114–119 (2017).
2. Kwon, J. E. et al. Triptycene-based quinone molecules showing multi-electron redox reactions for large capacity and high energy organic cathode materials in Li-ion batteries. *J. Mater. Chem. A* **6**, 3134–3140 (2018).
3. Peng, H. et al. Boosting lithium storage performance of small-molecule organic cathodes through synergistic molecular engineering and nanostructure design. *Angew. Chem. Int. Ed.* **64**, 202502088 (2025).
4. Zheng, S. et al. Hydrogen bond networks stabilized high-capacity organic cathode for lithium-ion batteries. *Angew. Chem. Int. Ed.* **62**, 202217710 (2023).
5. Peng, C. et al. Reversible multi-electron redox chemistry of  $\pi$ -conjugated N-containing heteroaromatic molecule-based organic cathodes. *Nat. Energy* **2**, 17074 (2017).
6. Nakashima, K. et al. A new design strategy for redox-active molecular assemblies with crystalline porous structures for lithium-ion batteries. *Chem. Sci.* **11**, 37–43 (2020).
7. Wu, M. S. et al. Supramolecular self-assembled multi-electron-acceptor organic molecule as high-performance cathode material for Li-ion batteries. *Adv. Energy Mater.* **11**, 2100330 (2021).
8. Luo, Z., Liu, L., Zhao, Q., Li, F. & Chen, J. An insoluble benzoquinone-based organic cathode for use in rechargeable lithium-ion batteries. *Angew. Chem. Int. Ed.* **56**, 12735–12739 (2017).
9. Huang, W. et al. Quasi-Solid-state rechargeable lithium-ion batteries with a calix[4]quinone cathode and gel polymer electrolyte. *Angew. Chem. Int. Ed.* **52**, 9162–9166 (2013).
10. Shi, T. et al. Oxidized indanthrone as a cost-effective and high-performance organic cathode material for rechargeable lithium batteries. *Energy Storage Mater.* **50**, 2652–73 (2022).
11. Xie, J., Wang, Z., Xu, Z.-J. & Zhang, Q. Toward a high-performance all-plastic full

- battery with a single organic polymer as both cathode and anode. *Adv. Energy Mater.* **8**, 1703509 (2018).
12. Wang, Y. et al. High-performance polymeric lithium salt electrode material from phenol–formaldehyde condensation. *ACS Appl. Mater. Interfaces* **13**, 37289–37298 (2021).
  13. Wang, A. et al. Solution-processable redox-active polymers of intrinsic microporosity for electrochemical energy storage. *J. Am. Chem. Soc.* **144**, 17198–17208 (2022).
  14. Wang, Z. et al. Few layer covalent organic frameworks with graphene sheets as cathode materials for lithium-ion batteries. *Nanoscale* **11**, 5330–5335 (2019).
  15. Gao, H. et al. A pyrene-4,5,9,10-tetraone-based covalent organic framework delivers high specific capacity as a Li-ion positive electrode. *J. Am. Chem. Soc.* **144**, 9434–9442 (2022).
  16. Liu, X. et al. In situ growth of covalent organic framework nanosheets on graphene as the cathode for long-life high-capacity lithium-ion batteries. *Adv. Mater.* **34**, 2203605 (2022).
  17. Wu, M. et al. A 2D covalent organic framework as a high-performance cathode material for lithium-ion batteries. *Nano Energy* **70**, 104498 (2020).
  18. Hai, Y. et al. Facile controlled synthesis of spinel  $\text{LiMn}_2\text{O}_4$  porous microspheres as cathode material for lithium ion batteries. *Front. Chem.* **7**, 437 (2019).
  19. Cho, J., Kim, Y. J. & Park, B. Novel  $\text{LiCoO}_2$  cathode material with  $\text{Al}_2\text{O}_3$  coating for a Li ion cell. *Chem. Mater.* **12**, 3788–3791 (2000).
  20. Deng, X. et al. A comparative investigation of single crystal and polycrystalline Ni-rich NCMs as cathodes for lithium-ion batteries. *Energy Environ. Mater.* **6**, e12331 (2023).
  21. Huang, X., Yao, Y., Liang, F. & Dai, Y. Concentration-controlled morphology of  $\text{LiFePO}_4$  crystals with an exposed (100) facet and their enhanced performance for use in lithium-ion batteries. *J. Alloy. Compd.* **743**, 763–772 (2018).
  22. Duan, J. et al. Enhanced electrochemical performance and thermal stability of  $\text{LiNi}_{0.80}\text{Co}_{0.15}\text{Al}_{0.05}\text{O}_2$  via nano-sized  $\text{LiMnPO}_4$  coating. *Electrochim. Acta* **221**,

- 14–22 (2016).
23. Mao, M. et al. Electronic conductive inorganic cathodes promising high-energy organic batteries. *Adv. Mater.* **33**, 2005781 (2021).
  24. Shi, P. et al. A novel mixture of lithium bis (oxalato) borate, gamma-butyrolactone and non-flammable hydrofluoroether as a safe electrolyte for advanced lithium ion batteries. *J. Mater. Chem. A* **5**, 19982–19990 (2017).
  25. Xu, J. et al. Extending the low temperature operational limit of Li-ion battery to  $-80\text{ }^{\circ}\text{C}$ . *Energy Storage Mater.* **23**, 383–389 (2019).
  26. Fan, X. et al. All-temperature batteries enabled by fluorinated electrolytes with non-polar solvents. *Nat. Energy* **4**, 882–890 (2019).
  27. Qin, R., Wei, Y., Zhai, T. & Li, H. LISICON structured  $\text{Li}_3\text{V}_2(\text{PO}_4)_3$  with high rate and ultralong life for low-temperature lithium-ion batteries. *J. Mater. Chem. A* **6**, 9737–9746 (2018).
  28. Dong, X. et al. High-energy rechargeable metallic lithium battery at  $-70\text{ }^{\circ}\text{C}$  enabled by a cosolvent electrolyte. *Angew. Chem. Int. Ed.* **58**, 5623–5627 (2019).
  29. Dong, X., Guo, Z., Guo, Z., Wang, Y. & Xia, Y. Organic batteries operated at  $-70\text{ }^{\circ}\text{C}$ . *Joule* **2**, 902–913 (2018).
  30. Zheng, Y. et al. Accelerating ion dynamics under cryogenic conditions by the amorphization of crystalline cathodes. *Adv. Mater.* **33**, 2102634 (2021).
